# Supplementary material for: Statistical analysis and significance testing of serial analysis of gene expression data using a Poisson mixture model
Source: PubMed Central journal article supplement (PMC2147036; doi:10.1186/1471-2105-8-282), 2007-08-02
Supplement: 1471-2105-8-282-S1.pdf [file 1471-2105-8-282-S1.pdf]

# Derivation of Differential Expression Confidence Score

Scott Zuyderduyn (scottz@bccrc.ca)

May 4, 2007

Given Bayes Theorem:

$$P(A|B) = \frac{P(B|A)P(A)}{P(B)}$$

First, define A as the sample class (e.g. normal, cancer) and B as a mixture component(s). Therefore, re-write Bayes Theorem as:

$$P(\omega|k) = \frac{P(k|\omega)P(\omega)}{P(k)}$$

The probability of sample type  $\omega$  being part of mixture component  $k$  is given as:

$$P(k|\omega) = \sum_j^{\omega} \tau_{jk} / N_{\omega}$$

where  $\tau_{jk}$  is the posterior probability that observation  $j$  arose from component  $k$  and  $N_{\omega}$  is the number of libraries of type  $\omega$ .

The probability that a sample is of type  $\omega$  is simply:

$$P(\omega) = N_{\omega} / N$$

where  $N$  is the total number of libraries.

The probability that a sample arose from mixture component  $k$  is given as:

$$P(k) = \sum_j \tau_{jk} / N$$

Substituting terms, we arrive at:

$$P(\omega|k) = \frac{\sum_j^{\omega} \tau_{jk}}{N_{\omega}} \frac{N_{\omega}}{N} / \frac{\sum_j \tau_{jk}}{N}$$

Finally, by canceling like terms, we have the expression:

$$P(\omega|k) = \sum_j^{\omega} \tau_{jk} / \sum_j \tau_{jk}$$
